# Supplementary material for: Cloning and Functional Verification of CYP408A3 and CYP6CS3 Related to Chlorpyrifos Resistance in the Sogatella furcifera (Horváth) (Hemiptera: Delphacidae)
Source: MDPI journal article supplement (doi:10.3390/biology10080795), 2021-08-18
Supplement: s1 [file s1]

Supplementary Table S1. The primers of insecticide resistant-related P450 genes.

| Types of primers   | Primer            | Sequence (5'-3')          | Length |
|--------------------|-------------------|---------------------------|--------|
| RT-qPCR            | <i>CYP408A3-F</i> | CGGCAGCTCCCATACTGATT      | 105    |
|                    | <i>CYP408A3-R</i> | GCAGACCGTAGATAGGCACC      |        |
|                    | <i>CYP6CS3-F</i>  | TGTACCCTTGGTCCTGTGGA      | 159    |
|                    | <i>CYP6CS3-R</i>  | CAGGGATGTCAGTGGGTGTC      |        |
|                    | <i>CYP4CE3-F</i>  | CCTGTGTACGGTTGTGCTGA      | 135    |
|                    | <i>CYP4CE3-R</i>  | AAAGTCGGCGAGTGTCCAAA      |        |
|                    | <i>CYP4DD1-F</i>  | CGGATGCTCGGCAGTTCTAA      | 145    |
|                    | <i>CYP4DD1-R</i>  | TCCAGCACTGAATGGACAGT      |        |
|                    | <i>CYP6AX3-F</i>  | CAGCGCTACTGATCCGATGT      | 150    |
|                    | <i>CYP6AX3-R</i>  | GCATTCTCCACTTCTCGCCT      |        |
|                    | <i>CYP6AY3-F</i>  | GACGAGGGAATTGAGGCGAA      | 132    |
|                    | <i>CYP6AY3-R</i>  | TCTTGCCAACTCGTACAGGC      |        |
|                    | <i>CYP6ER4-F</i>  | CGGCAGCTCCCATACTGATT      | 105    |
|                    | <i>CYP6ER4-R</i>  | GCAGACCGTAGATAGGCACC      |        |
|                    | <i>CYP6FJ3-F</i>  | AGCGTTCTGGGAGTCCTGAT      | 148    |
|                    | <i>CYP6FJ3-R</i>  | TGAAGCTCTCTTTGGAGCGT      |        |
|                    | <i>CYP417A4-F</i> | GGCCTCCAACAGTTCCCATT      | 123    |
|                    | <i>CYP417A4-R</i> | CCAGCCAAACTCTGACGGTA      |        |
|                    | <i>CYP418A2-F</i> | TGTACCCTTGGTCCTGTGGA      | 159    |
|                    | <i>CYP418A2-R</i> | CAGGGATGTCAGTGGGTGTC      |        |
| Full-length primer | <i>CYP408A3-F</i> | TCATAAGATTCCACATATACAAT   | 1491   |
|                    | <i>CYP408A3-R</i> | AAATTCCACTGGAAATTGAGAA    |        |
|                    | <i>CYP6CS3-F</i>  | ATGGAACCTTAAGAAGTACATCAA  | 1460   |
|                    | <i>CYP6CS3-R</i>  | TTACAGCTTTTCGAACCTAGCAT   |        |
| Reference gene     | <i>RPL9F</i>      | TGTGTGACCACCGAGAACAACCTCA | 142    |
|                    | <i>RPL9R</i>      | ACGATGAGCTCGTCCTTCTGCTTT  |        |

Supplementary Table S2. This study used in vitro primers for dsRNA synthesis of insecticide resistant-related P450 genes.

|      |                     |                                 |     |
|------|---------------------|---------------------------------|-----|
| RNAi | <i>dsCYP6CS3-F</i>  | TAATACGACTCACTATAGGGACTTGTCCCTC | 715 |
|      |                     | AGTTTGGCAAT                     |     |
|      | <i>dsCYP6CS3-R</i>  | TAATACGACTCACTATAGGGCCGAAAACA   | 708 |
|      |                     | TGCGGTAACCC                     |     |
|      | <i>dsCYP408A3-F</i> | TAATACGACTCACTATAGGGTGGTGGTGA   | 708 |
|      |                     | TTCTGTTACTGT                    |     |
|      | <i>dsCYP408A3-R</i> | TAATACGACTCACTATAGGGACAGTCGGA   |     |
|      |                     | CTTATGAGCGT                     |     |

Supplementary Table S3. The dsRNA synthesis concentration of P450 gene

| Gene              | Concentration(ng/μL) |
|-------------------|----------------------|
| <i>dsCYP6CS3</i>  | 1193.7               |
|                   | 1865.4               |
|                   | 2021.1               |
|                   | 2508.5               |
| <i>dsCYP408A3</i> | 2337.0               |
|                   | 2465.7               |
